# Supplementary material for: Effective removal of chemical warfare agent simulants using water stable metal–organic frameworks: mechanistic study and structure–property correlation
Source: Royal Society of Chemistry journal article supplement (doi:10.1039/c6ra28131a), 2017-01-01
Supplement: c6ra28131a1.pdf [file c6ra28131a1.pdf]

[Type text]

# Supporting Information

[Type text]

**Effective Removal of Chemical Warfare Agent Simulants Using Water Stable Metal-Organic Frameworks: Mechanistic Study and Structure-Property Correlation**

P. Asha,<sup>a</sup> Mekhola Sinha,<sup>a</sup> Sukhendu Mandal<sup>a\*</sup>

<sup>a</sup>School of Chemistry, Indian Institute of Science Education and Research-Thiruvananthapuram, Kerala, Thiruvananthapuram-695016, India. Email: [sukhendu@iisertvm.ac.in](mailto:sukhendu@iisertvm.ac.in)

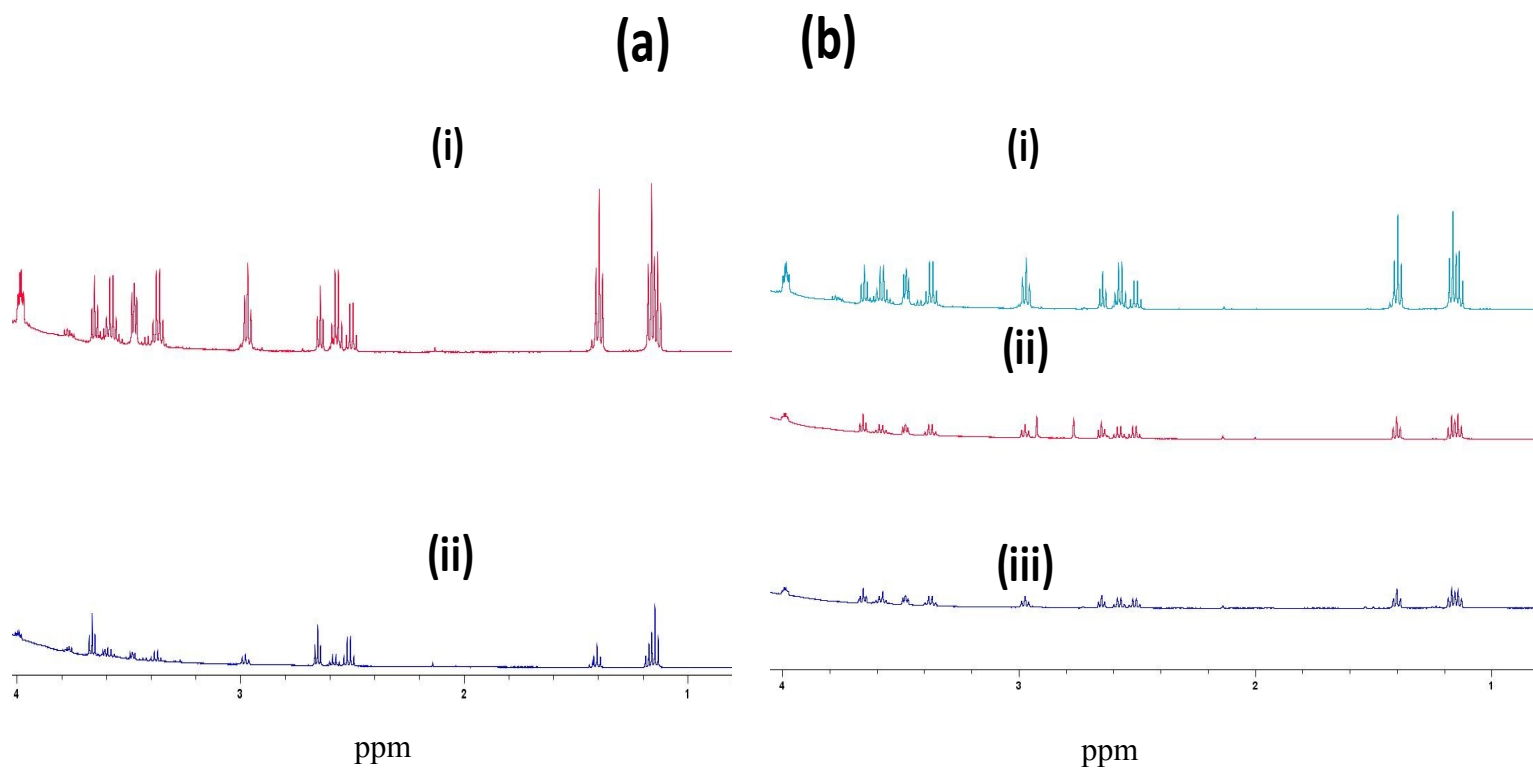

**Figure S1.**  $^1\text{H}$  NMR data showing the adsorption of 2-CEES and/or its hydrolysis products in water

(a) (i) Before adsorption with NU-1000 (ii) 30 minutes after the process of adsorption, intensity of every peak decreased considerably.

(b)(i) Before adsorption with UiO-67 (ii) 30 minutes after the process of adsorption. The new peaks may correspond to the hydrolysis products of 2-CEES (iii) 1 hour after the adsorption process

[Type text]

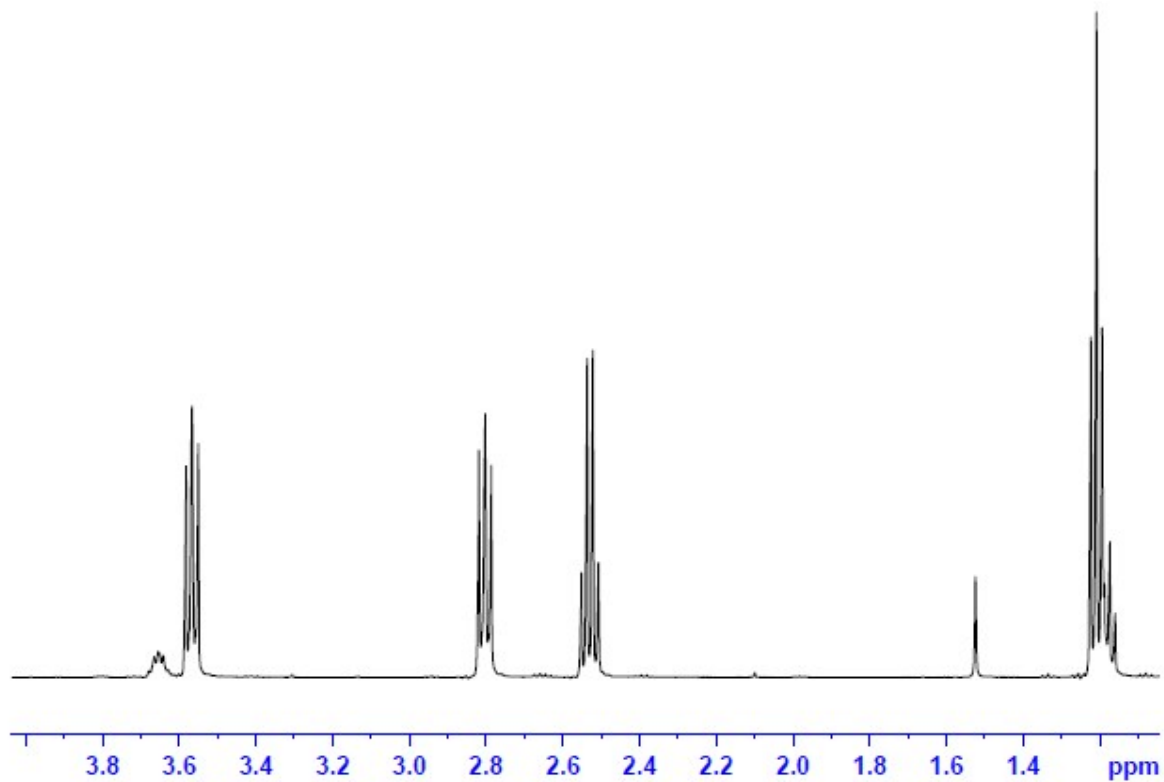

**Figure S2.** <sup>1</sup>H NMR spectrum of 2-CEES in CHCl<sub>3</sub> solvent. Note that 2-CEES was not hydrolyzed in CHCl<sub>3</sub> solvent

[Type text]

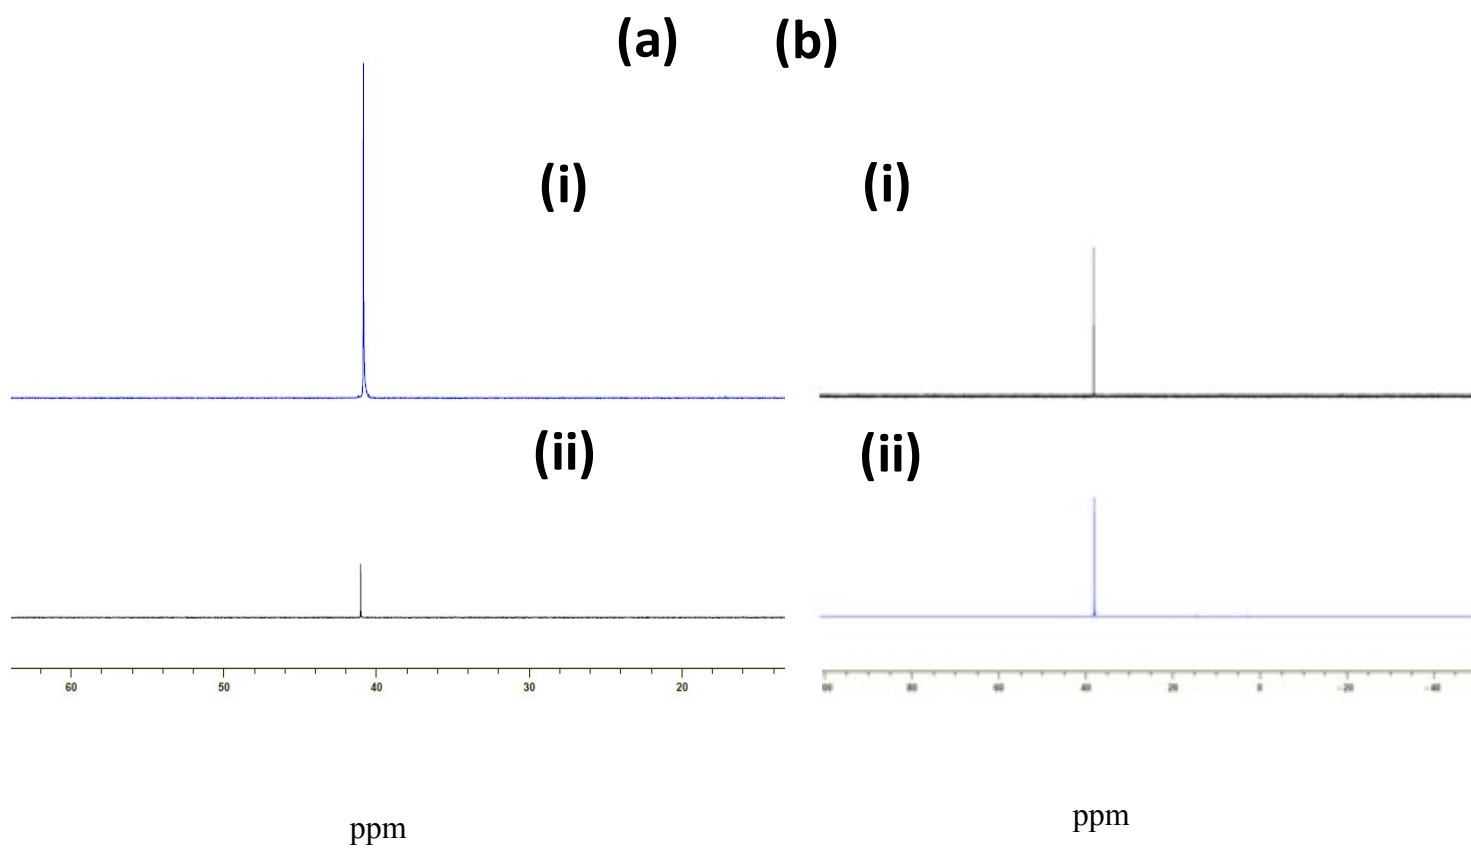

**Figure S3.**  $^{31}\text{P}$  NMR data of DMMP in water (a) (i) before adsorption with NU-1000; (ii) 30 minutes after the process of adsorption; (b) (i) before adsorption with UiO-67; (ii) 30 minutes after the process of adsorption

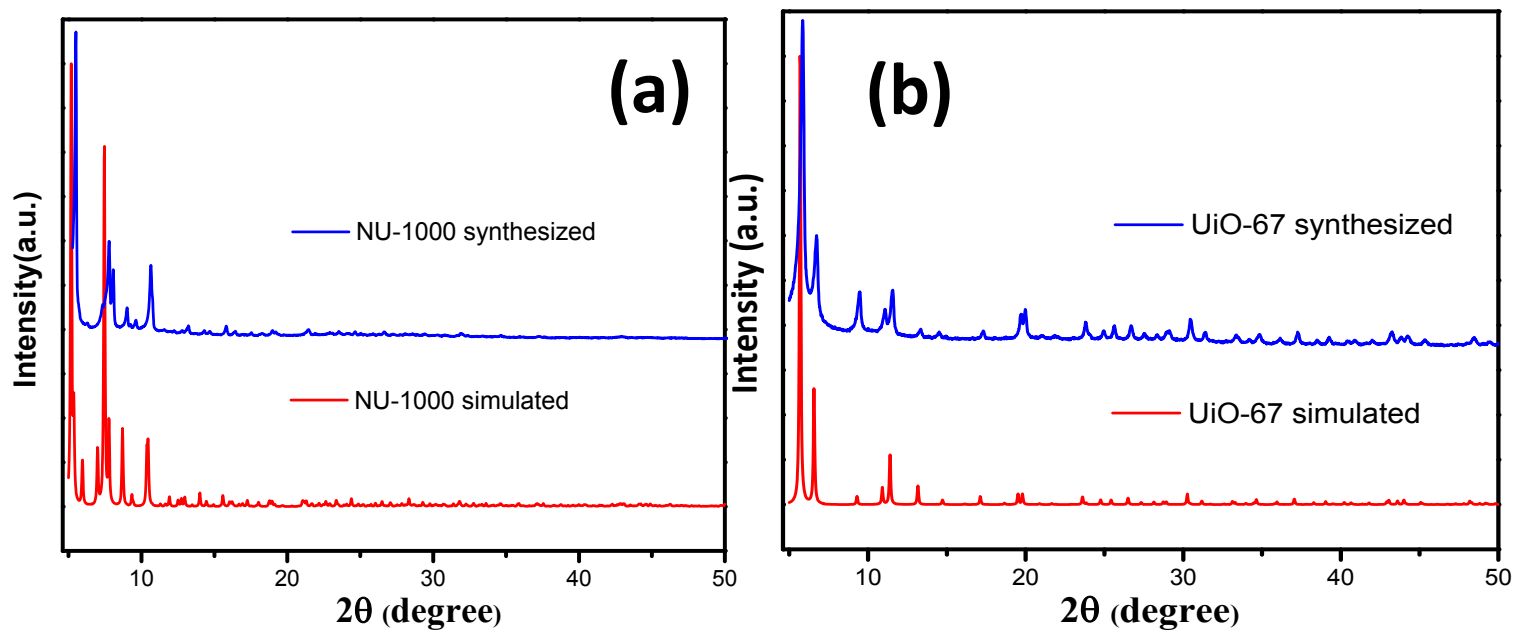

**Figure S4.** PXRD plots showing the purity of (a) NU-1000 and (b) UiO-67

[Type text]

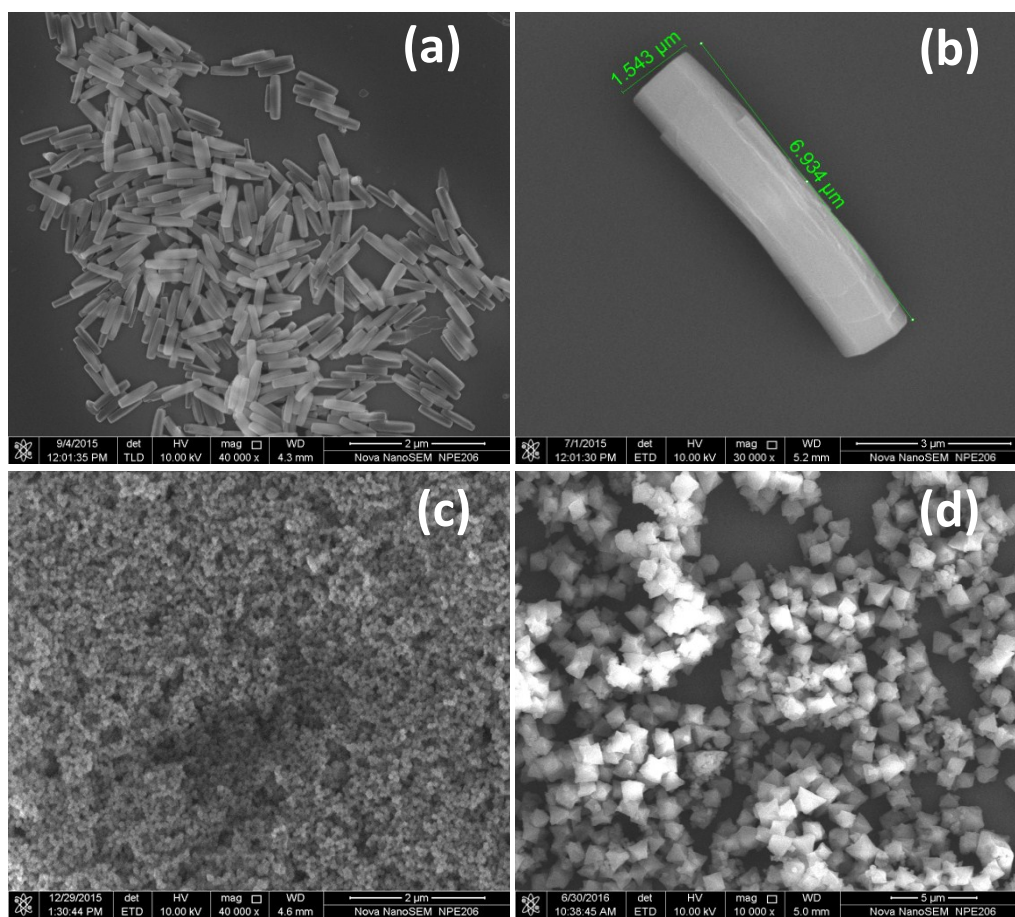

**Figure S5.** SEM images of (a) & (b) NU-1000 and (c) & (d) UiO-67 showing their uniform particle sizes

[Type text]

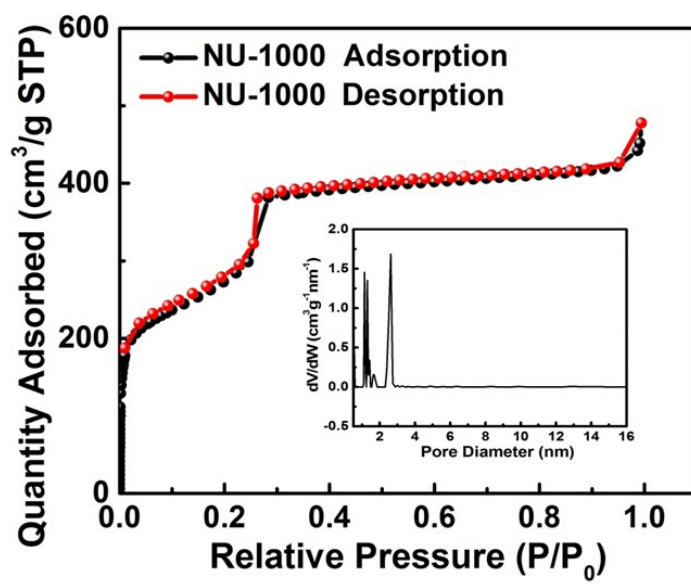

Figure S6. Surface properties measurement of NU-1000



[Type text]

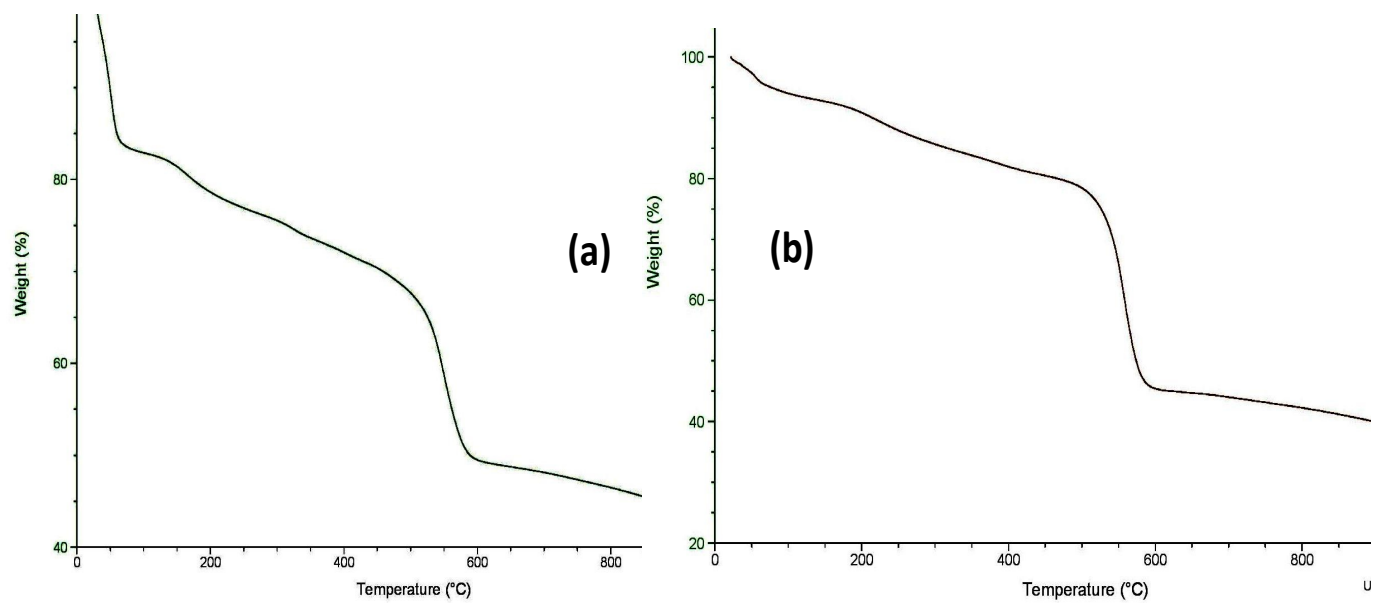

**Figure S7.** TGA plots of (a) NU-1000 and (b) UiO-67

[Type text]

(a)

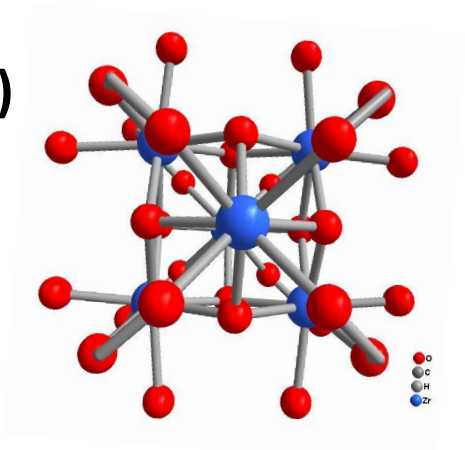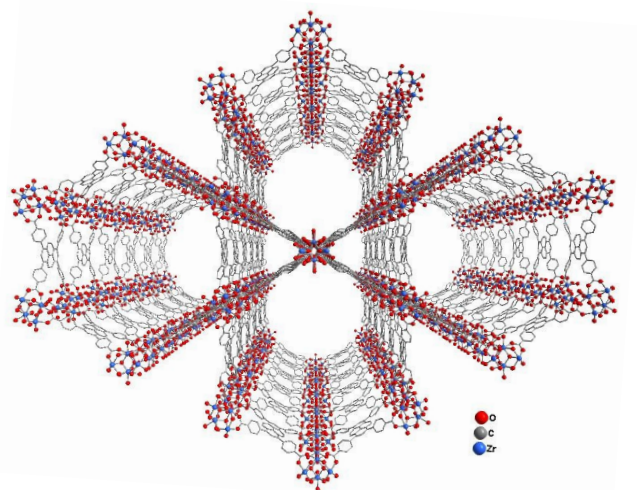

(b)

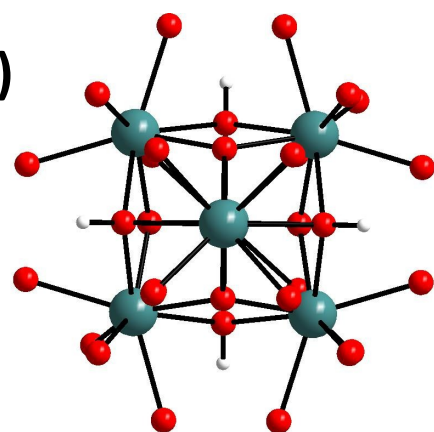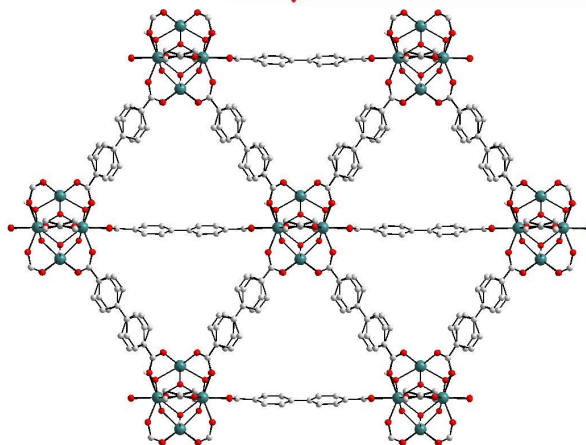

**Figure S8.** Pictorial representation showing the cluster node and three dimensional structures of (a) NU-1000 and (b) UiO-67

[Type text]

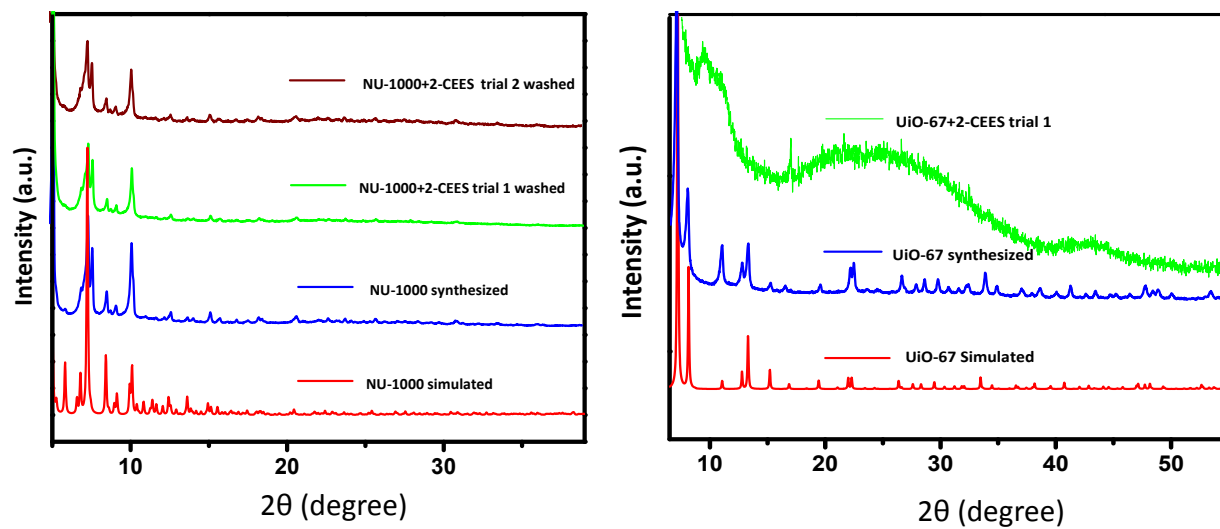

**Figure S9.** PXRD data of (a) NU-1000 and (b) UiO-67 after adsorption of 2-CEES.

[Type text]

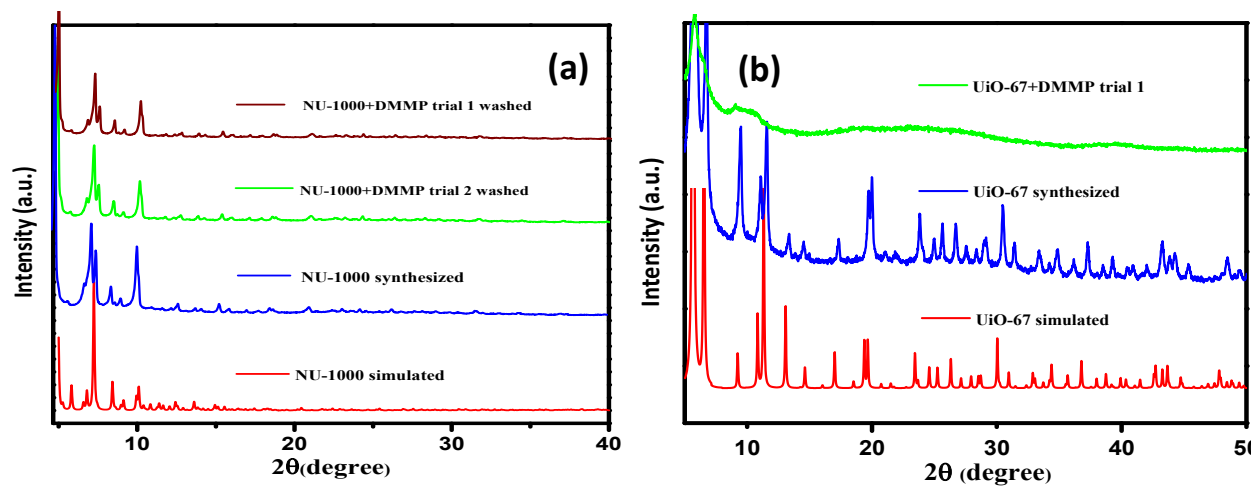

**Figure S10.** Powder XRD data of (a) NU-1000 and (b) UiO-67 on adsorption of DMMP.

[Type text]

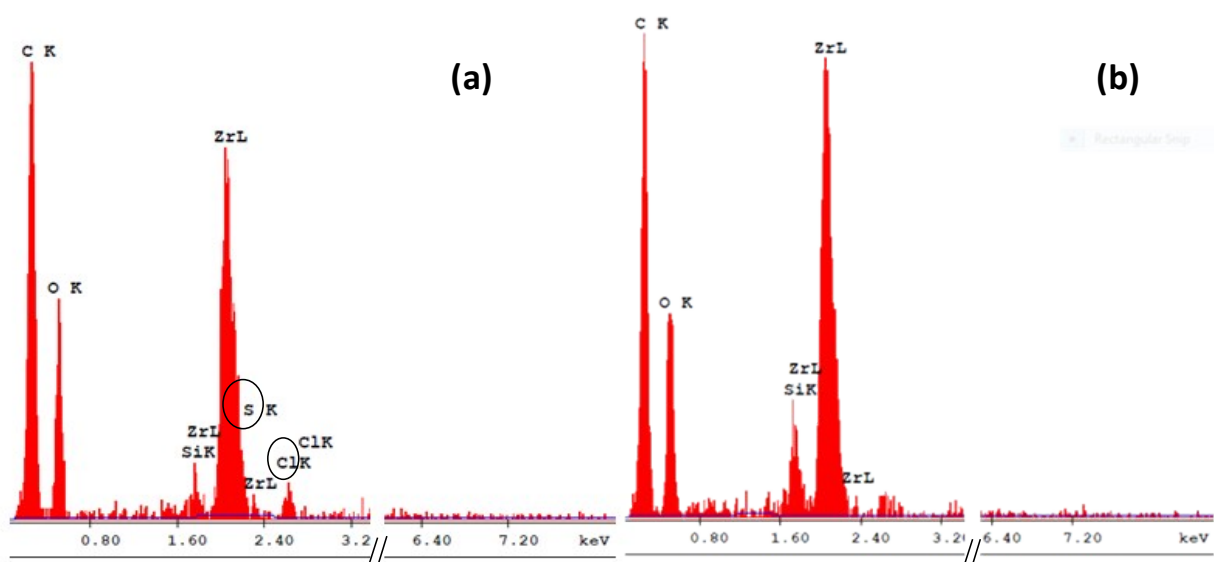

**Figure S11.** SEM-EDX data of adsorption of 2-CEES and/or its hydrolysis products on NU-1000 (a) after adsorption study and (b) after removal

[Type text]

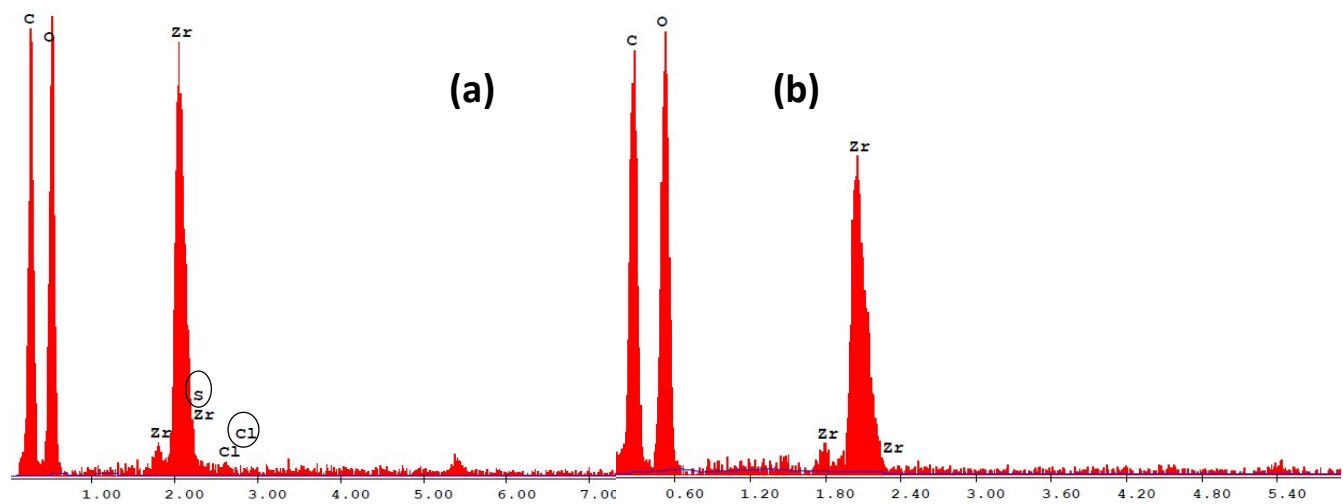

**Figure S12.** SEM-EDX data of adsorption of 2-CEES and/or its hydrolysis products on UiO-67 (a) after adsorption study and (b) after removal

[Type text]

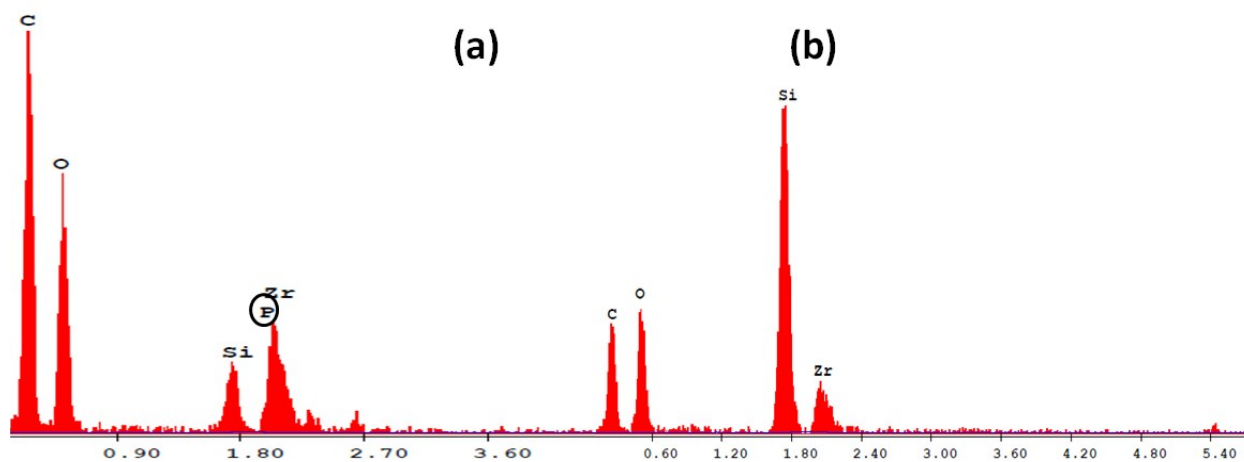

**Figure S13.** SEM-EDX data of DMMP on NU-1000 (a) after adsorption study and (b) after removal

[Type text]

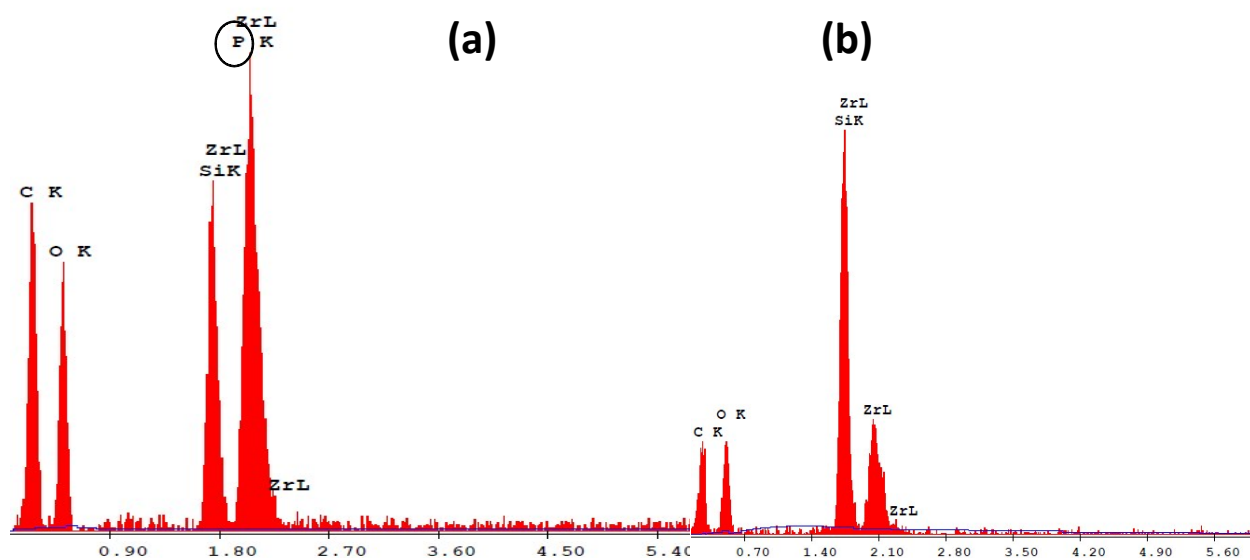

**Figure S14.** SEM-EDX data of adsorption of DMMP on UiO-67 (a) after adsorption study and (b) after removal



[Type text]

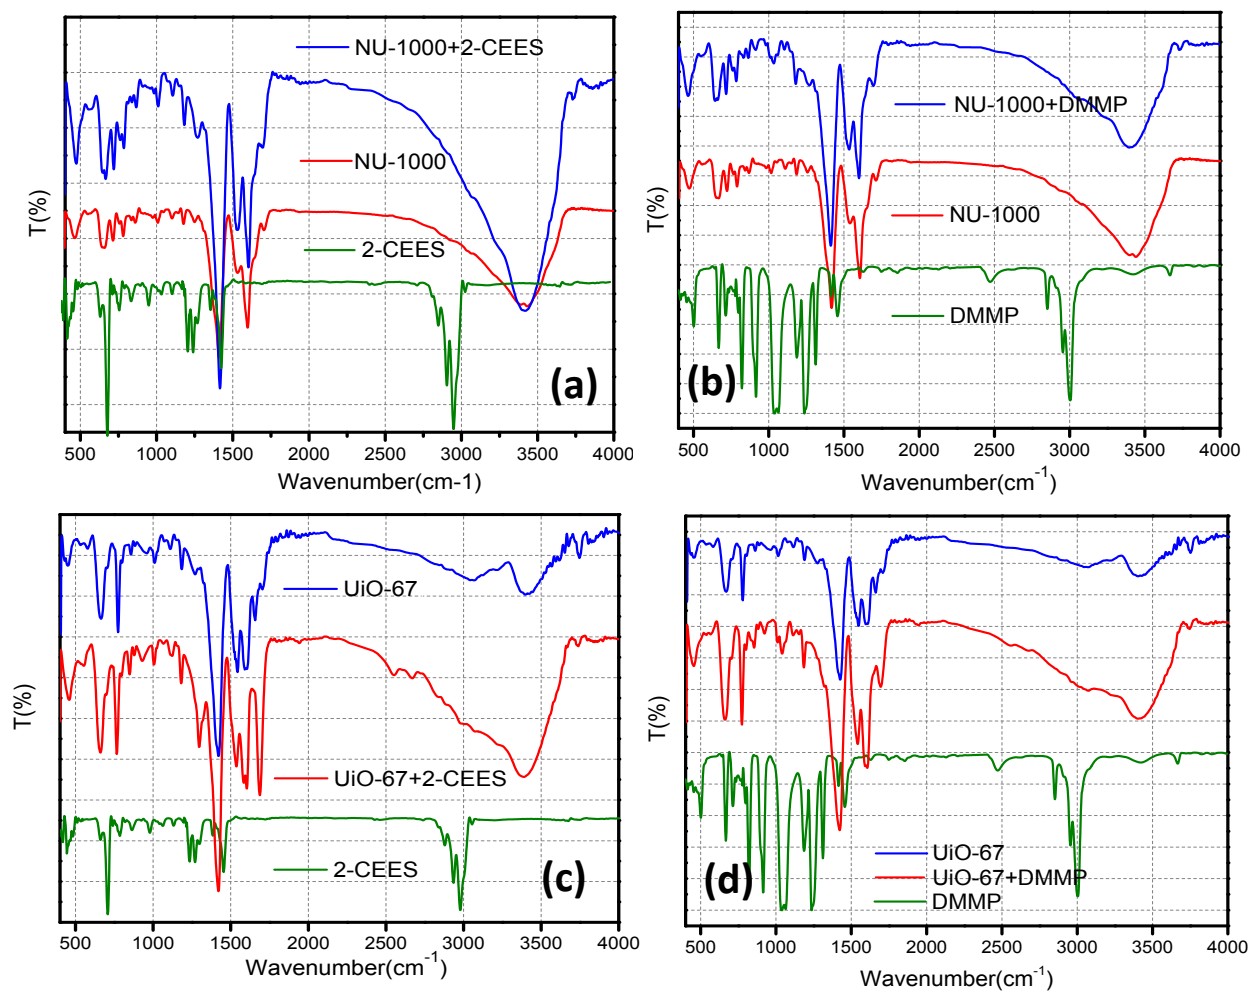

**Figure S15.** FT-IR spectra of the combinations (a) NU-1000-2-CEES; (b) NU-1000-DMMP; (c) UiO-67- 2-CEES and (d) UiO-67-DMMP

[Type text]

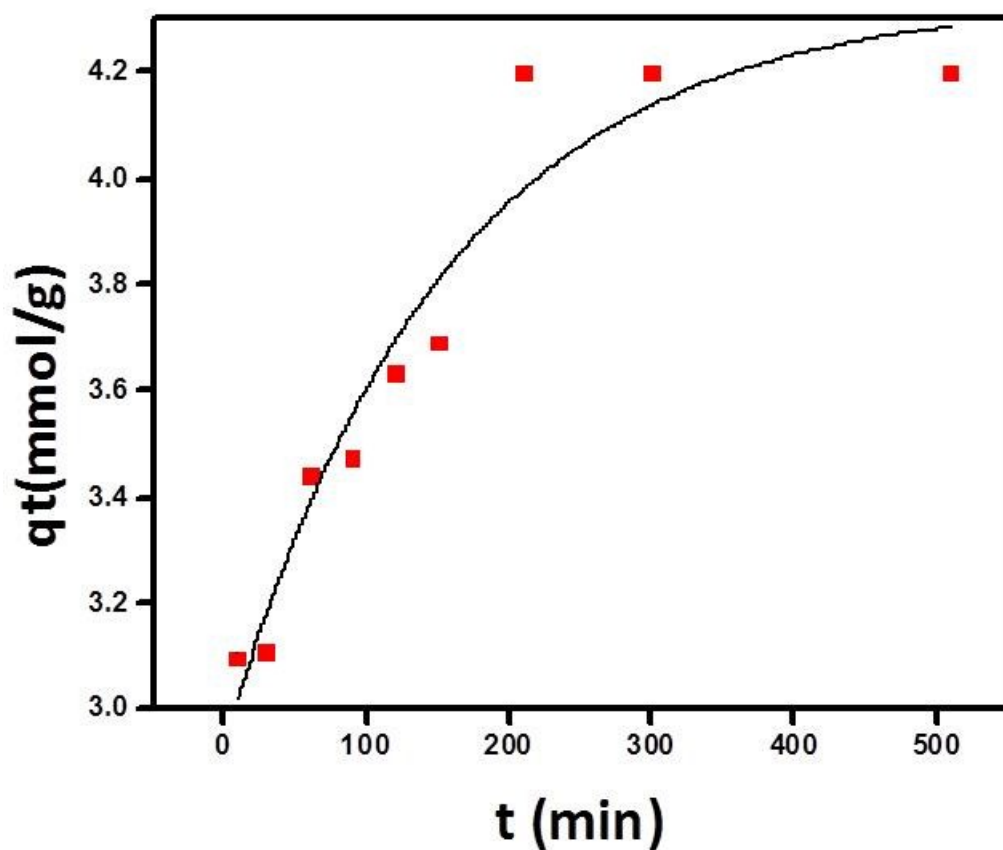

Figure S16.  $q_t$  vs.  $t$  graph for the adsorption of 2-CEES on NU-1000 MOF

[Type text]

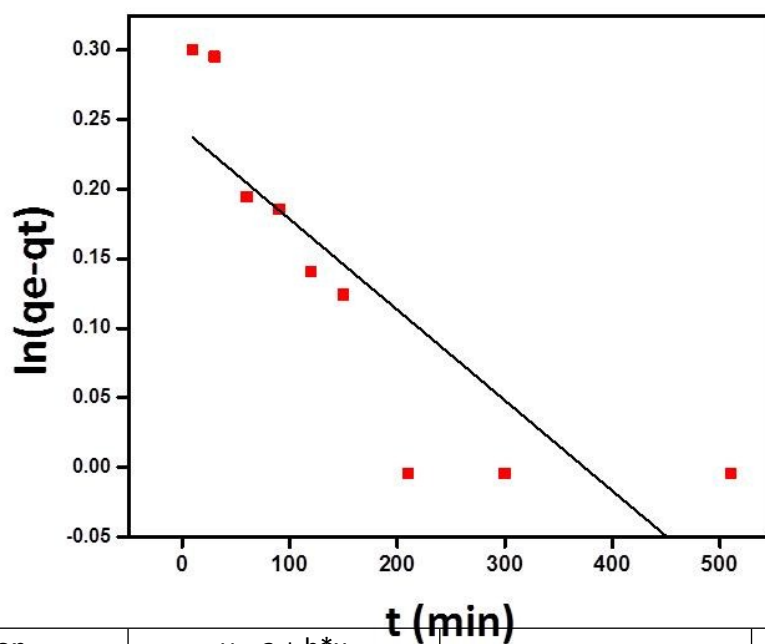

|                                |               |             |                |
|--------------------------------|---------------|-------------|----------------|
| <b>Equation</b>                | $y = a + b*x$ |             |                |
| <b>Weight</b>                  | No Weighting  |             |                |
| <b>Residual Sum of Squares</b> | 0.03245       |             |                |
| <b>Pearson's r</b>             | -0.85075      |             |                |
| <b>Adj. R-Square</b>           | 0.68432       |             |                |
|                                |               | Value       | Standard Error |
| <b>B</b>                       | Intercept     | 0.24358     | 0.03377        |
|                                | Slope         | -6.51348E-4 | 1.52085E-4     |

**Figure S17.** Pseudo first order kinetic plot and the corresponding data for the adsorption of 2-CEES on NU-1000 MOF

[Type text]

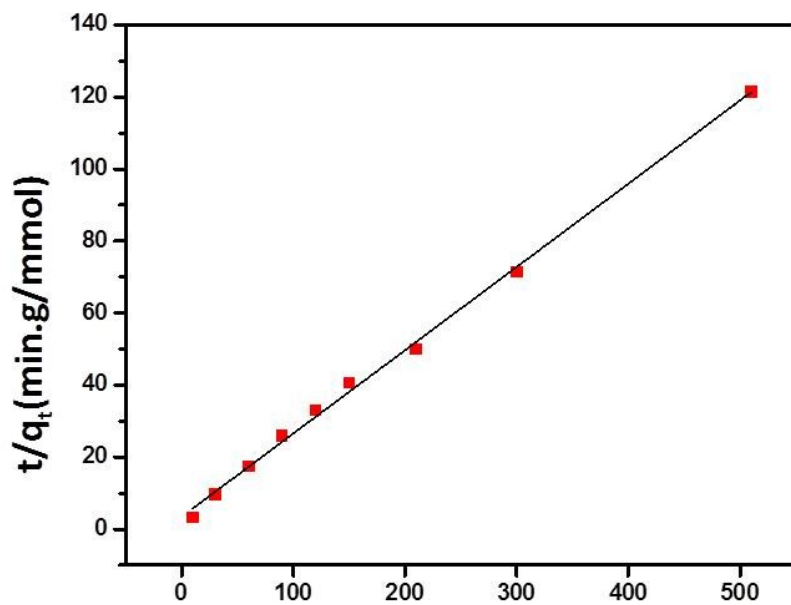

|                                |                                    |         |                |
|--------------------------------|------------------------------------|---------|----------------|
| <b>Equation</b>                | $y = a + b \cdot x$ <b>t (min)</b> |         |                |
| <b>Weight</b>                  | No Weighting                       |         |                |
| <b>Residual Sum of Squares</b> | 25.26525                           |         |                |
| <b>Pearson's r</b>             | 0.99882                            |         |                |
| <b>Adj. R-Square</b>           | 0.99731                            |         |                |
|                                |                                    | Value   | Standard Error |
| <b>B</b>                       | Intercept                          | 3.41053 | 0.94235        |
|                                | Slope                              | 0.23129 | 0.00424        |

**Figure S18.** Pseudo second order kinetic plot and the corresponding data for the adsorption of 2-CEES on NU-1000 MOF

[Type text]

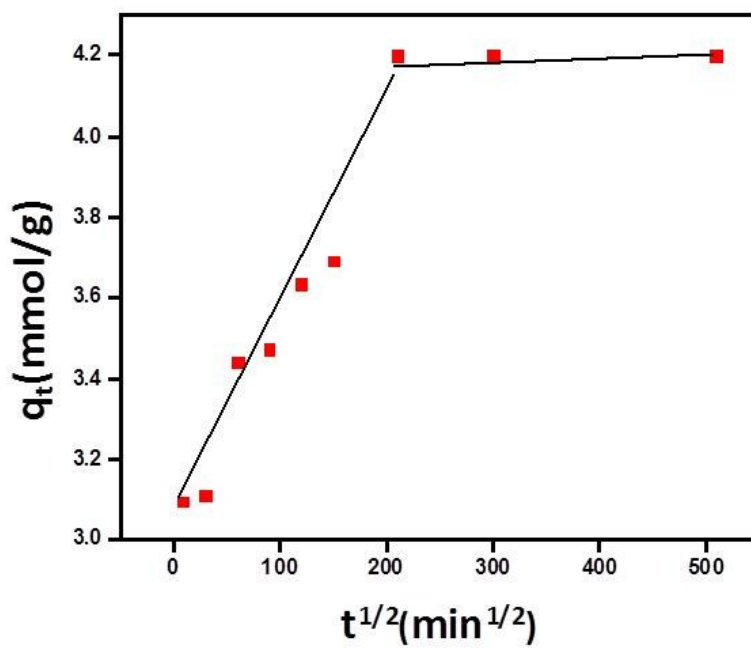

**Figure S19.** Intra-particle diffusion model for the adsorption of 2-CEES on NU-1000 MOF

[Type text]

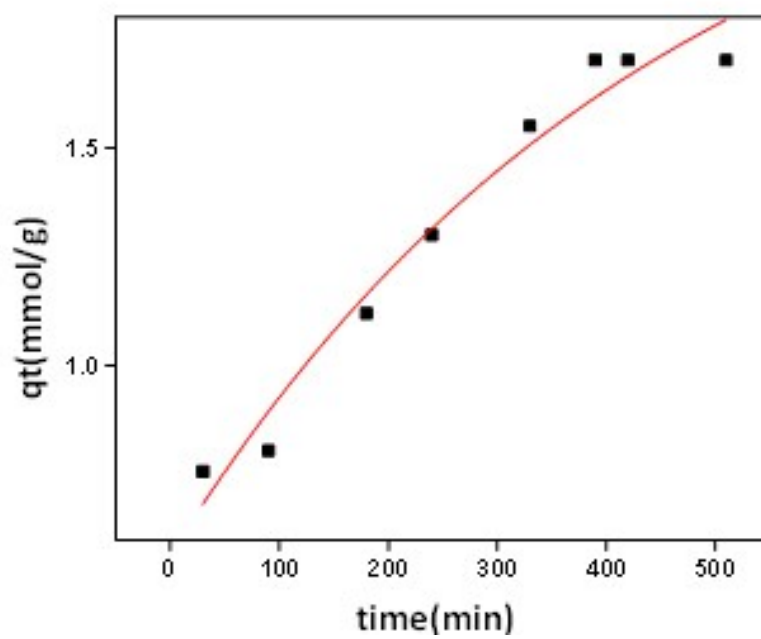

**Figure S20.**  $q_t$  vs.  $t$  graph for the adsorption of DMMP on NU-1000 MOF

[Type text]

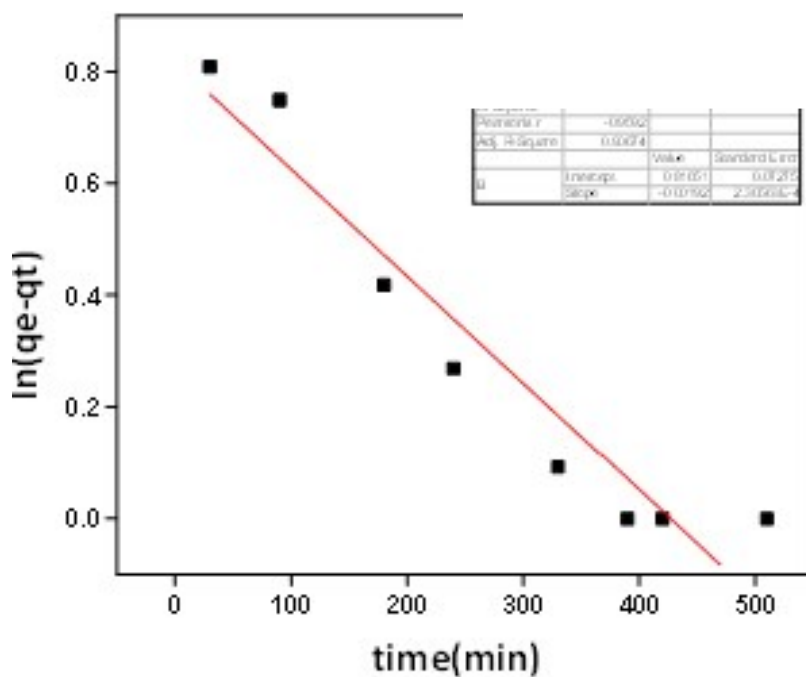

|                                |               |          |                |
|--------------------------------|---------------|----------|----------------|
| <b>Equation</b>                | $y = a + b*x$ |          |                |
| <b>Weight</b>                  | No Weighting  |          |                |
| <b>Residual Sum of Squares</b> | 0.06283       |          |                |
| <b>Pearson's r</b>             | -0.9592       |          |                |
| <b>Adj. R-Square</b>           | 0.90674       |          |                |
|                                |               | Value    | Standard Error |
| <b>B</b>                       | Intercept     | 0.81651  | 0.07275        |
|                                | Slope         | -0.00192 | 2.30563E-4     |

**Figure S21.** Pseudo first order kinetic plot and the corresponding data for the adsorption of DMMP on NU-1000 MOF

[Type text]

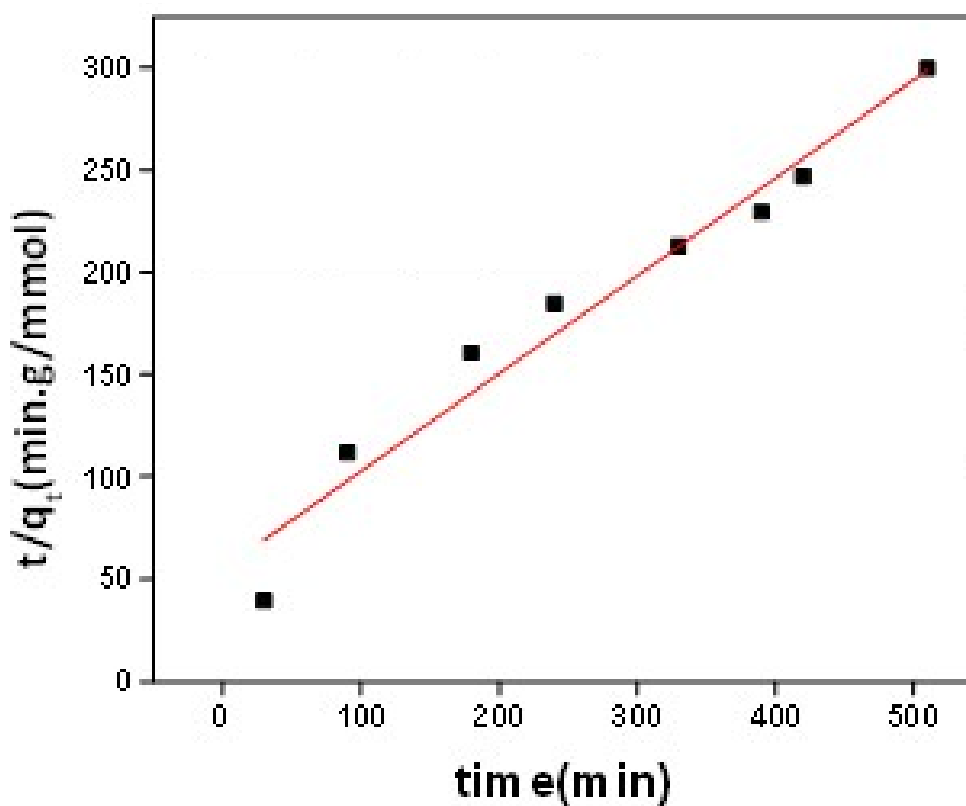

|                                |               |          |                |
|--------------------------------|---------------|----------|----------------|
| <b>Equation</b>                | $y = a + b*x$ |          |                |
| <b>Weight</b>                  | No Weighting  |          |                |
| <b>Residual Sum of Squares</b> | 1905.84048    |          |                |
| <b>Pearson's r</b>             | 0.97948       |          |                |
| <b>Adj. R-Square</b>           | 0.95261       |          |                |
|                                |               | Value    | Standard Error |
| <b>B</b>                       | Intercept     | 54.90239 | 12.67057       |
|                                | Slope         | 0.47802  | 0.04016        |

**Figure S22.** Pseudo second order kinetic plot and the corresponding data for the adsorption of DMMP on NU-1000 MOF



[Type text]

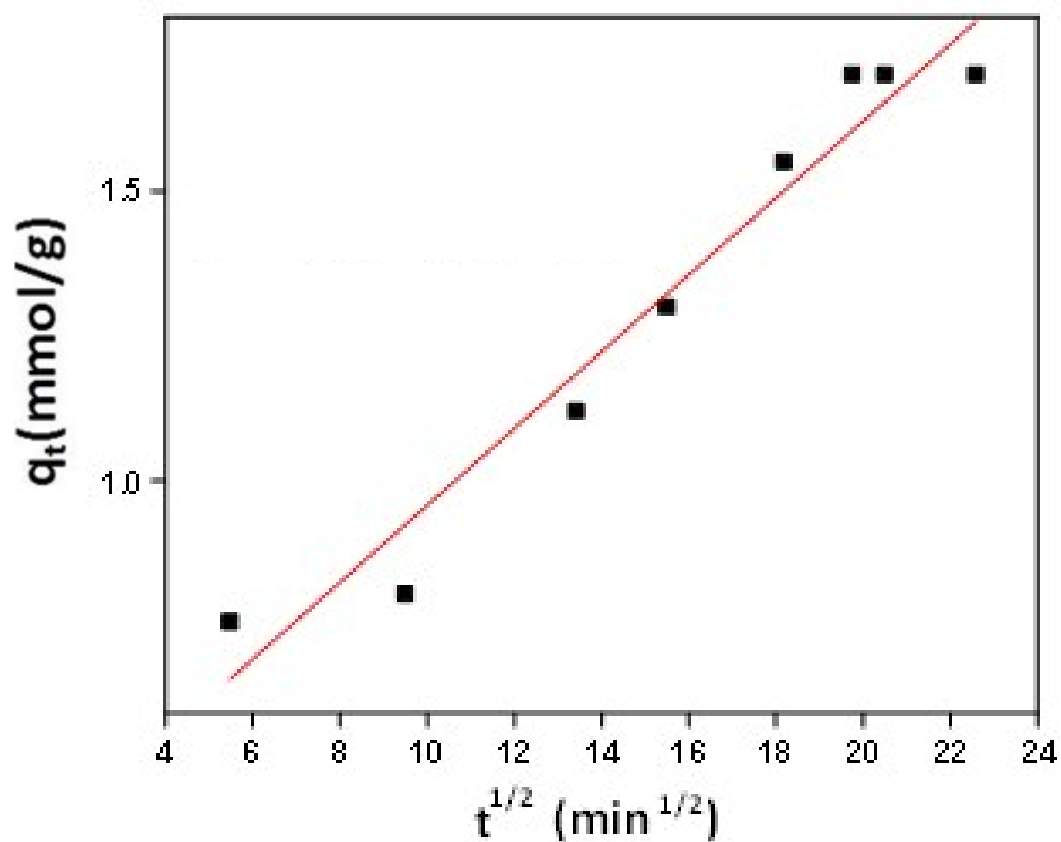

|                                |               |         |                |
|--------------------------------|---------------|---------|----------------|
| <b>Equation</b>                | $y = a + b*x$ |         |                |
| <b>Weight</b>                  | No Weighting  |         |                |
| <b>Residual Sum of Squares</b> | 0.05111       |         |                |
| <b>Pearson's r</b>             | 0.97664       |         |                |
| <b>Adj. R-Square</b>           | 0.94613       |         |                |
|                                |               | Value   | Standard Error |
| <b>B</b>                       | Intercept     | 0.29595 | 0.09838        |
|                                | Slope         | 0.06619 | 0.00595        |

**Figure S23.** Intra-particle diffusion model and the corresponding data for the adsorption of DMMP on NU-1000 MOF

[Type text]

Table S1. Decrease in concentration of 2-CEES and/or C and DMMP on adsorption with NU-1000 and UiO-67 and in the control experiments without the MOFs (ICP-AES data)

| Sl.No | Time(s) | Conc. of S/Zr (mg/L) |    |        |    |         | Time(s) | Conc. of P/Zr (mg/L) |    |        |    |         |
|-------|---------|----------------------|----|--------|----|---------|---------|----------------------|----|--------|----|---------|
|       |         | 2-CEES               |    |        |    |         |         | DMMP                 |    |        |    |         |
|       |         | NU-1000              |    | UiO-67 |    | Control |         | NU-1000              |    | UiO-67 |    | Control |
|       |         | S                    | Zr | S      | Zr |         |         | P                    | Zr | P      | Zr |         |
| 1     | 0       | 316.78               | 0  | 316.78 | 0  | 315.26  | 0       | 128.42               | 0  | 128.42 | 0  | 127.01  |
| 2     | 10      | 85.31                | -  | -      | -  | -       | 30      | 71.97                | -  | -      | -  | -       |
| 3     | 30      | 83.96                | -  | -      | -  | -       | 90      | 71.79                | -  | -      | -  | -       |
| 4     | 60      | 59.3                 | -  | -      | -  | -       | 180     | 70.29                | -  | -      | -  | -       |
| 5     | 90      | 57.23                | -  | -      | -  | -       | 240     | 70.24                | -  | -      | -  | -       |
| 6     | 120     | 45.69                | -  | -      | -  | -       | 330     | 68.47                | -  | -      | -  | -       |
| 7     | 150     | 40.65                | -  | -      | -  | -       | 390     | 1.55                 | -  | -      | -  | 125.95  |
| 8     | 210     | 2.95                 | -  | -      | -  | 316.21  | 420     | 1.55                 | -  | -      | -  | -       |
| 9     | 300     | 2.93                 | -  | -      | -  | -       | 510     | 1.55                 | 0  | 5.72   | 0  | 125.57  |
| 10    | 510     | 2.93                 | 0  | 17.30  | 0  | 310.13  |         |                      |    |        |    |         |

Table S2. Reusability of NU-1000 in adsorbing 2-CEES and/or C and DMMP (ICP-AES data)

|         |         | Conc. of S in 2-CEES( mg/L) |       | Conc. of P in DMMP( mg/L) |       |
|---------|---------|-----------------------------|-------|---------------------------|-------|
|         |         | Time(min)                   |       | Time(min)                 |       |
|         |         | 0                           | 510   | 0                         | 510   |
| NU-1000 | Trial 1 | 316.78                      | 2.93  | 316.78                    | 1.55  |
|         | Trial 2 | 316.78                      | 7.79  | 316.78                    | 3.15  |
|         | Trial 3 | 316.78                      | 77.79 | 316.78                    | 19.17 |
